# Supplementary material
Source: HighWire-hosted journal article supplement (https://bmjopen.bmj.com/content/9/3/e023978)
Supplement: inline-supplementary-material-2 [file inline-supplementary-material-2.pdf]

## Supplementary Information 2: Quality Assessment of studies

| Author                         | Question 1 |    | Question 2 |    | Question 3 |    | Question 4 |    | Question 5 |    | Methodological quality |
|--------------------------------|------------|----|------------|----|------------|----|------------|----|------------|----|------------------------|
|                                | Yes        | No | Yes        | No | Yes        | No | Yes        | No | Yes        | No |                        |
| Bryne <sup>2</sup>             |            | X  |            | X  |            | X  |            | X  |            | X  | Poor                   |
| Callaghan & Ryan <sup>22</sup> |            | X  | X          |    | X          |    | X          |    | X          |    | Moderate               |
| Chalfin et al <sup>23</sup>    |            | X  | X          |    |            | X  | X          |    | X          |    | Poor                   |
| Cook et al <sup>24</sup>       |            | X  | X          |    | X          |    | X          |    | X          |    | Moderate               |
| Dresser <sup>6</sup>           |            | X  |            | X  |            | X  | X          |    |            | X  | Poor                   |
| David et al <sup>25</sup>      |            | X  | X          |    | X          |    | X          |    | X          |    | Moderate               |
| Frank <sup>7</sup>             |            | X  | X          |    |            | X  |            | X  | X          |    | Poor                   |
| Kapur et al <sup>8</sup>       |            | X  | X          |    | X          |    |            | X  |            | X  | Poor                   |
| Mitchell <sup>26</sup>         |            | X  |            | X  |            | X  |            | X  |            | X  | Poor                   |
| Muzaffer <sup>27</sup>         |            | X  | X          |    |            | X  | X          |    |            | X  | Poor                   |
| Richardson <sup>28</sup>       |            | X  | X          |    | X          |    | X          |    | X          |    | Moderate               |
| Ryan & Callaghan <sup>29</sup> |            | X  | X          |    | X          |    | X          |    | X          |    | Moderate               |
| Sontheimer <sup>30</sup>       |            | X  | X          |    | X          |    |            | X  | X          |    | Poor                   |
| Szawarski <sup>31</sup>        |            | X  | X          |    | X          |    | X          |    | X          |    | Moderate               |
| Volpe et al <sup>32</sup>      |            | X  | X          |    |            | X  |            | X  |            | X  | Poor                   |

Note: *Selection*: question 1: Did the patient(s) represent the whole experience of the investigator or is the selection method unclear to the extent that other patients with similar presentations may not have been presented?; *Ascertainment*: question 2: Was the case adequately ascertained?, question 3: Was the outcome adequately ascertained?; *Causality*: question 4: Was follow-up long enough for outcomes to occur?; *Reporting*: question 5: Is the case described with sufficient details to allow practitioners to make inferences on their own practice?
